# Supplementary material for: Pre-clinical evaluation of CYP 2D6 dependent drug–drug interactions between primaquine and SSRI/SNRI antidepressants
Source: PubMed Central journal article supplement (PMC4869338; doi:10.1186/s12936-016-1329-z), 2016-05-17

A.

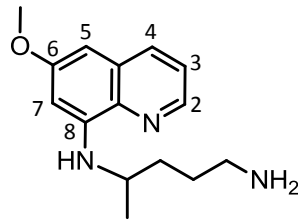

Primaquine

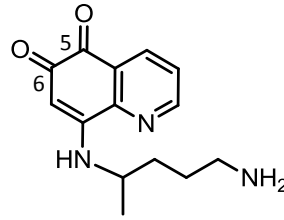

5,6-ortho-quinone

|                  | Observed Parent m/z | Product m/z | Cone (v) | Collision (v) | ESI Mode | Retention Time | Liver LLOQ (ng/mL) |
|------------------|---------------------|-------------|----------|---------------|----------|----------------|--------------------|
| PQ               | 260.26              | 175.02      | 22       | 22            | Pos      | 2.10           | 2.5                |
| 5,6-o-quinone-PQ | 260.20              | 147.08      | 26       | 30            | Pos      | 1.80           | 5                  |

B. Parent Primaquine Liver Levels

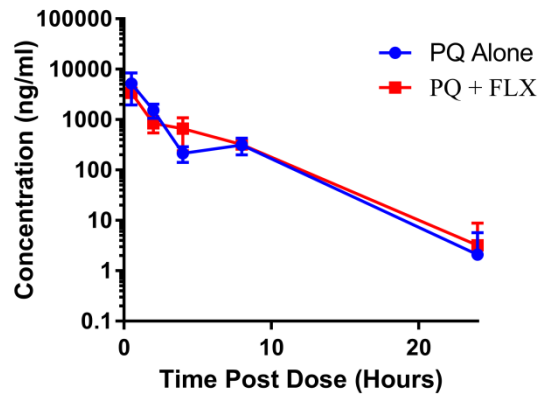

C. 5,6-orthoquinone liver levels

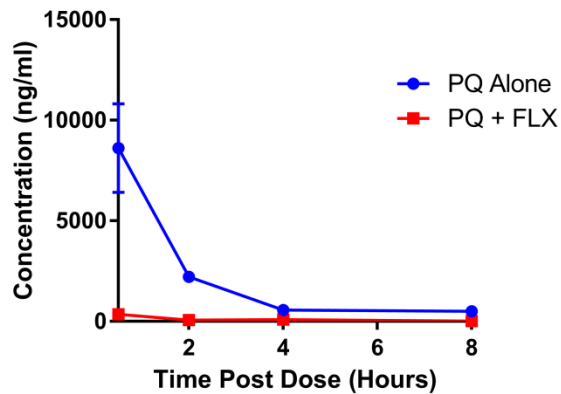

Supplement: 12936_2016_1329_MOESM1_ESM.pdf [file 12936_2016_1329_MOESM1_ESM.pdf]
